# Supplementary material
Source: PubMed Central journal article supplement (PMC3133678)
Supplement: NIHMS308254-supplement-1.pdf [file NIHMS308254-supplement-1.pdf]

*Cytokine stimulation (30 min, 10 ng/ml):*

*Stattic-V (50 ng/ml):*

| (-) |   | rhIL-6 |   |
|-----|---|--------|---|
| -   | + | -      | + |

pStat3 →

pStat1 →

Total Stat3 →

Total Stat1 →

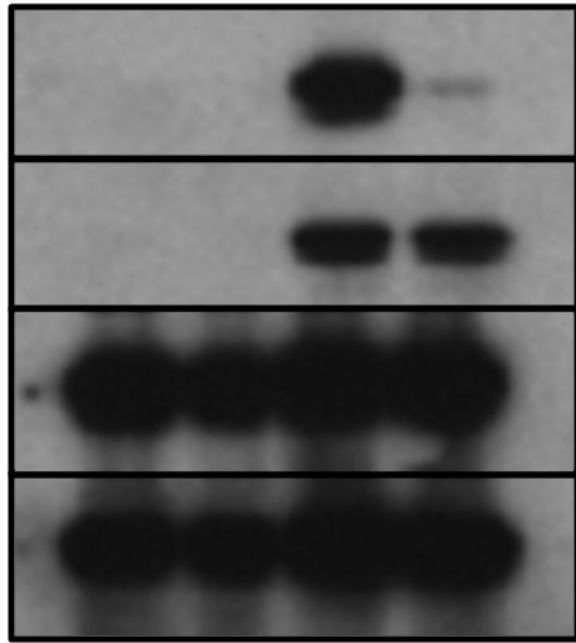

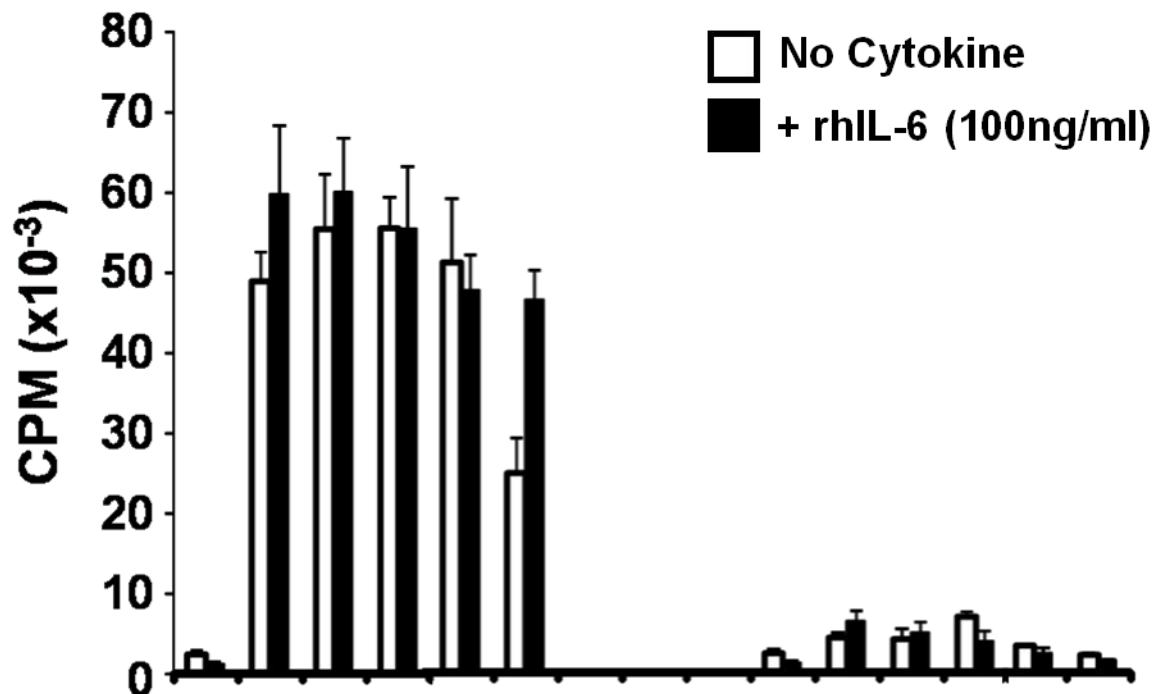

|                                            |   |   |   |   |   |   |   |   |   |   |   |   |
|--------------------------------------------|---|---|---|---|---|---|---|---|---|---|---|---|
| APC                                        | + | + | + | + | + | + | + | + | + | + | + | + |
| CD4 <sup>+</sup> CD25 <sup>-</sup> T cell  | - | + | + | + | + | + | - | - | - | - | - | - |
| CD4 <sup>+</sup> CD25 <sup>high</sup> Treg | - | - | - | - | - | - | + | + | + | + | + | + |
| Stattic-V                                  | - | - | + | - | - | - | - | - | + | - | - | - |
| Peptide inhibitor                          | - | - | - | + | - | - | - | - | - | + | - | - |
| Inactive peptide                           | - | - | - | - | + | - | - | - | - | - | + | - |
| Stat Inhibitor VII                         | - | - | - | - | - | + | - | - | - | - | - | + |

**CD4<sup>+</sup>CD25<sup>-</sup>  
T cell**

*IL-6 (ng/ml):*

0 2.5 5 10 20 40 80 100

**pStat3** →

**pStat1** →

**Total Stat3** →

**Total Stat1** →

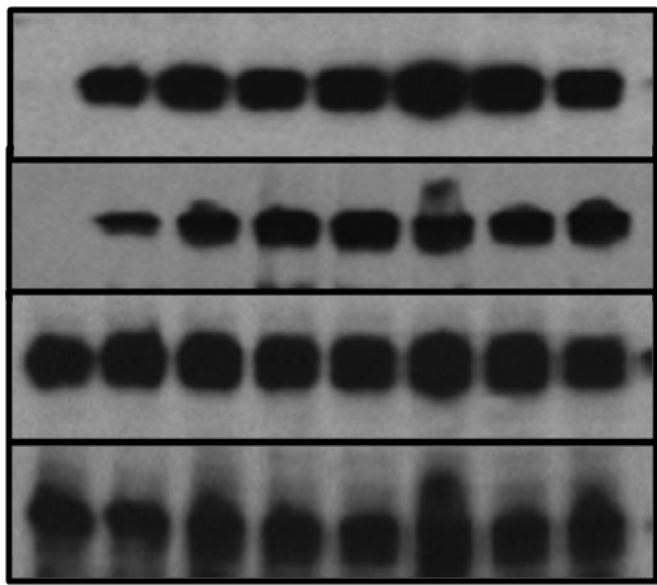

**Figure S1: Stattic-V decreases level of Stat3, but not Stat1, phosphorylation in IL-6-stimulated CD4<sup>+</sup>CD25<sup>-</sup> T cells.** CD4<sup>+</sup>CD25<sup>-</sup> T cells were isolated from healthy donors by flow cytometry sorting. Cells were stimulated with or without rhIL-6 (10 ng/ml) and Stattic V (10 ng/ml) for 30 min. Protein lysates were prepared and immunoblotted using antibodies specific for pStat3, total Stat3, pStat1, and total Stat1. Immunoblot shown is representative of six separate experiments.

**Figure S2: Inhibition of Stat3 phosphorylation does not alter proliferation of CD4<sup>+</sup>CD25<sup>-</sup> T cells or CD4<sup>+</sup>CD25<sup>high</sup> Treg cells.** CD4<sup>+</sup>CD25<sup>-</sup> T cells and CD4<sup>+</sup>CD25<sup>high</sup> Treg cells were isolated from the peripheral blood of healthy volunteers by flow cytometry sorting, and cultured with allo-APC and indicated inhibitors of Stat3 phosphorylation. Data shown is representative of three separate experiments  $\pm$  SEM.

**Figure S3: Primary T cells phosphorylate Stat1 and Stat3 in response to very low concentrations of rhIL-6.** CD4<sup>+</sup>CD25<sup>-</sup> T cells were isolated from peripheral blood of healthy donors. Cells were stimulated for 30 min with indicated concentrations of rhIL-6. Blot shown is representative of three separate experiments.

**Table SI. Antigen presenting cells express minimal levels of IL-6R $\alpha$  and gp130.**

|                | <b>Normal APC<br/>non-irradiated<sup>a</sup></b> | <b>Normal APC<br/>irradiated 30Gy</b> |
|----------------|--------------------------------------------------|---------------------------------------|
| IL-6R $\alpha$ | 0.2 $\pm$ 0.1                                    | 0.7 $\pm$ 0.3                         |
| gp130          | 8.7 $\pm$ 1.8                                    | 12.3 $\pm$ 1.4                        |

<sup>a</sup> n=3; measured by flow cytometric analysis and expressed as percent of cells positive for indicated surface protein.
